# Supplementary material
Source: PubMed Central journal article supplement (PMC3295287)
Supplement: 1201042109_pnas.201201042SI.pdf [file 1201042109_pnas.201201042SI.pdf]

# Supporting Information

Yasuda et al. 10.1073/pnas.1201042109

## SI Materials and Methods

**Mice.** C57BL/6 were purchased from Oriental yeast, *Rag2*<sup>-/-</sup> and *gc*<sup>-/-</sup>*Rag2*<sup>-/-</sup> mice were from Taconic. All animal experiments were performed in accordance with guidelines of the Institutional Animal Care Committee of Hyogo College of Medicine (Hyogo, Japan).

**Reagents.** Chitin was purchased from New England Biolabs. Fluorescent-labeled antibodies for CCR3, and Siglec F were purchased from BD Biosciences; Gr-1, CD45, Sca-1, CD3, CD4, CD8, CD19, NK1.1, c-Kit, and B220 were from BioLegend; T1/ST2 was from MD Biosciences; and IgE (23G3) was from Southern Biotechnology Associates. Recombinant human IL-33 (rhIL-33) was made by Hokudo Co.

**Generation of *Il33*<sup>-/-</sup> Mice.** The *Il33* gene was isolated from genomic DNA extracted from ES cells (GSI-I) by PCR. The targeting vector was constructed by replacing a 2.9-kb fragment encoding the *Il33* ORF with a *neomycin-resistance* gene cassette (*neo*), and a herpes simplex virus thymidine kinase (HSV-TK) driven by the PGK promoter had been inserted into the genomic fragment for negative selection. After the targeting vector was transfected into ES cells, G418 and gancyclovir doubly resistant colonies were selected, screened by PCR, and further confirmed by Southern blotting. Homologous recombinants were micro-injected into blastocysts from C57BL/6 female mice, and heterozygous F1 progenies were intercrossed to obtain *Il33*<sup>-/-</sup> mice. *Il33*<sup>-/-</sup> mice under 129Sv × C57BL/6 background were backcrossed to C57BL/6 for four generations and their littermate controls were used for the experiments.

**Helminths Infection.** At indicated time points after infection, the lungs were prepared for histology or analysis of protein or RNA after perfusing the mice via the right ventricle with 10 mL PBS under anesthesia. Bronchoalveolar lavage was performed and bronchoalveolar lavage fluid (BALF) cells were analyzed with flow cytometry. Sera were collected at 0, 7, 10, and 14 d after infection and measured the concentrations of IgE and mouse mast cell protease 1 (mMCP-1) by ELISA (1, 2). Seven days after infection, mesenteric lymph nodes (mLNs) were harvested and cell suspensions were enriched for CD4<sup>+</sup> cells by positive sorting on AutoMACS (Miltenyi Biotec) with magnetic beads conjugated with anti-CD4 mAb. The CD4<sup>+</sup> cells were stimulated with anti-CD3 and anti-CD28 antibodies. The culture supernatants were harvested 24 h later and measured the concentrations of IFN- $\gamma$ , IL-4, and IL-5. In IL-33 reconstitution experiment, *Il33*<sup>-/-</sup> mice received intranasal administration of 4  $\mu$ g rhIL-33 at 1 d before and 0, 1, 2, and 3 d after infection.

**Chitin Administration.** Mice were intranasally administered 50  $\mu$ L of 0.75 mg chitin or 2-mg glass beads under anesthesia, and at indicated time points, histological and BALFs analysis were performed.

**Histological Analysis.** Lungs were fixed with 4% (wt/vol) paraformaldehyde and embedded with paraffin. Deparaffinized sections were microwave-heated in citrated buffer (pH 6.0) for antigen retrieval, then blocked with 1% BSA, stained with affinity-purified rabbit anti-mouse IL-33 polyclonal antibody, followed by biotinylated goat anti-rabbit antibody (Vector Labs) and Alexa-555-labeled streptavidin (Invitrogen). For the double-staining experiment, IL-33-stained sections were blocked and stained with anti-Pro surfactant Protein C antibody (Millipore), following biotinylated goat anti-rabbit antibody and Alexa-488-labeled streptavidin (Invitrogen), then mounted with Prolong Antifade Gold with DAPI (Invitrogen). For macrophage staining, frozen sections of freshly isolated lung specimens were incubated with F4/80 mAb, biotinylated anti-rat IgG, and then Alexa Fluor 488-conjugated streptavidin (Molecular Probes). Nuclei were stained with DAPI (KPL). The immunostaining of each section was evaluated under microscope Zeiss LSM 510 (Carl Zeiss). Computer software, Zeiss LSM 510 ver. 3.2 (Carl Zeiss), was used for image processing and analysis.

**Flow Cytometry.** BALF cells were stained with antibodies for CD45, CD3, B220, CCR3, and Gr-1, examined by FACS Calibur (BD Biosciences) and classified as follows. CD45<sup>+</sup>CD3<sup>-</sup>B220<sup>-</sup>CCR3<sup>+</sup> cells: eosinophils; CD45<sup>+</sup>CD3<sup>+</sup>B220<sup>+</sup>CCR3<sup>-</sup> cells: lymphocytes; CD45<sup>+</sup>CD3<sup>-</sup>B220<sup>-</sup>CCR3<sup>-</sup>Gr-1<sup>high</sup> cells: neutrophils; and CD45<sup>+</sup>CD3<sup>-</sup>B220<sup>-</sup>CCR3<sup>-</sup>Gr-1<sup>-</sup> cells with high background intensity: monocytes. Monocytes were further confirmed with CD11a expression. Natural helper (NH) cells in BALF were examined for the expressions of lineage markers (CD3, CD4, CD8, CD19, Gr-1, Siglec F, IgE, NK1.1), Sca-1, c-Kit, and ST2. For intracellular IL-5 staining, BALF cells were incubated in the culture medium [10% (vol/vol) FCS-RPMI containing 2-mercaptoethanol, L-glutamine, penicillin, and streptomycin] for 3 h and stained surface antigens in the presence of monensin. Cells were fixed with 4% PFA, permeabilized with 0.1% saponin buffer (PBS with 0.1% saponin, 1 mM Hepes and 0.1% BSA) and stained with anti-IL-5 or control Ab (rat IgG1; BD Biosciences).

**Quantitative RT-PCR.** Total RNA was extracted with RNeasy Mini Kit (Qiagen) and the cDNA was synthesized using SuperScript III (Invitrogen). The expressions of genes were quantified with TaqMan Gene Expression Assays (Applied Biosystems). The result were shown as relative expression standardized with the expression of the gene-encoding eukaryotic 18S rRNA or  $\beta$ -actin. Specific primers and probes used for quantitative RT-PCR were *Il33*, *Il5*, *Il13*, *Epx*, *Prg2*, *Ccl11*, *Il18*, *Tslp*, *Il25*, *Actin-b*, and *18S* rRNA (Applied Biosystems).

1. Matsuba-Kitamura S (2010) Contribution of IL-33 to induction and augmentation of experimental allergic conjunctivitis. *Int Immunol* 22:479–489.

2. Sasaki Y (2005) IL-18 with IL-2 protects against *Strongyloides venezuelensis* infection by activating mucosal mast cell-dependent type 2 innate immunity. *J Exp Med* 202: 607–616.
